# Supplementary material for: Synthesis and optical characterization of a high-quality ZnS substrate for optoelectronics and UV solar-energy conversion
Source: Royal Society of Chemistry journal article supplement (doi:10.1039/c6ra15150g), 2016-01-01
Supplement: c6ra15150g1.pdf [file c6ra15150g1.pdf]

## Supporting Information

### **Synthesis and optical characterization of high-quality ZnS substrate available for optoelectronics and UV solar-energy conversion**

Ching-Hwa Ho <sup>a,b,\*</sup> and Min-Han Lin <sup>a</sup>

<sup>a</sup> Graduate Institute of Applied Science and Technology, National Taiwan University of Science and Technology, Taipei 106, Taiwan

<sup>b</sup> Graduate Institute of Electro-Optical Engineering and Department of Electronic and Computer Engineering, National Taiwan University of Science and Technology, Taipei 106, Taiwan

\*E-mail: [chho@mail.ntust.edu.tw](mailto:chho@mail.ntust.edu.tw)

## c-ZnS substrate crystal

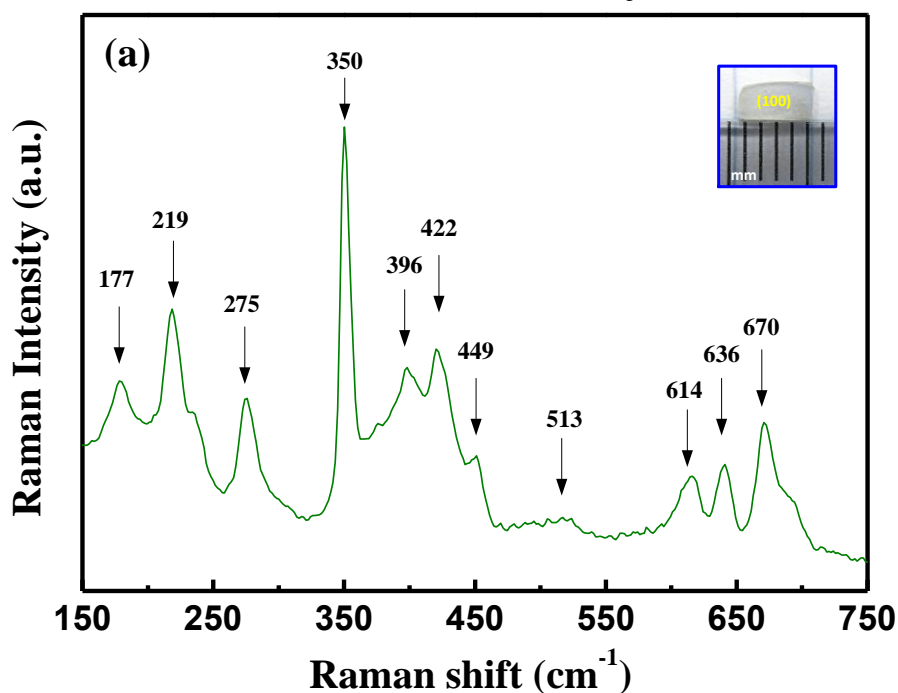

| Raman frequency ( $\text{cm}^{-1}$ ) | Attribution    | BZ points / lines |
|--------------------------------------|----------------|-------------------|
| 177                                  | 2 (TA)         | $\Gamma$          |
| 219                                  | 2 (LA)         | X- $\Gamma$       |
| 275                                  | TO             | $\Gamma$          |
| 350                                  | LO             | $\Gamma$          |
| 396                                  | LO+TA          | X                 |
| 422                                  | TO+LA<br>LO+TA | X<br>L            |
| 449                                  | LO+LA          | $\Gamma$          |
| 513                                  | 2(0) at W      | W                 |
| 614                                  | 2 (TO)         | L                 |
| 636                                  | LO+TO          | $\Gamma$          |
| 670                                  | 2 (LO)         | $\Gamma$          |

Zincblende Brillouin Zone (BZ)

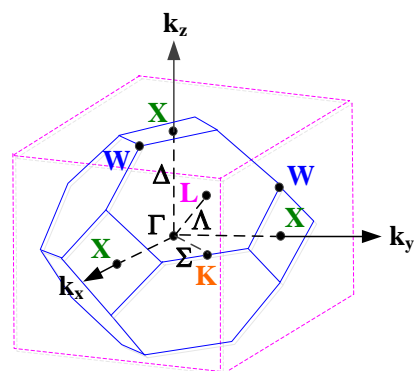

(c)

(b)

Figure S1. (a) Room-temperature Raman spectrum of *c*-ZnS substrate crystal on the {100} plane. The inset shows the crystal morphology and size of the substrate crystal. (b) Values and assignments of the Raman modes detected in the Raman spectrum. (c) The representative scheme for cubic Brillouin zone of the zinc blende structure in accounting for the Raman phonon bands of the ZnS in (b).

Figure S1(a) shows the Raman spectrum of a *c*-ZnS substrate crystal grown by CVT. The experiment was done on the {100} *c*-ZnS as the crystal morphology (picture) shown in the inset. The measurement range is from 150 cm<sup>-1</sup> to 750 cm<sup>-1</sup> by using a A<sup>+</sup>-ion laser of 514 nm as the excitation source. A lot of peak modes have been detected in Figure S1(a), which are all indexed to the cubic phase of the ZnS.<sup>32,33</sup> The attribution and origin of the detected Raman modes are listed in Figure S1(b) together with a representative scheme of cubic Brillouin zone (BZ) of the zinc blende ZnS is also included in Figure S1(c) for comparison. As shown in Figure S1(a), the most prominent peak is the longitudinal-optical phonon mode (LO ~ 350 cm<sup>-1</sup>) occurred at the  $\Gamma$  center point of the BZ in Figure S1(c). This prominent LO phonon goes through the entire bulk *c*-ZnS crystal, and which can be clearly detected by the low-temperature PL spectra with LO replicas [see Figure 4(a)], and also obtained from the temperature-dependent analysis of energy shift of the free-exciton emission in Figure 4(b), i.e. the  $\Theta_B$  value in the Bose-Einstein fit. As shown in the BZ of Figure S1(c), the  $\Gamma$  is the zone center, the X point is that of the  $\langle 100 \rangle$  direction, L point is  $\langle 111 \rangle$ , and K point represents that of  $\langle 110 \rangle$ , respectively. From  $\Gamma$  to X, it must undergo the *k* vector change of  $\Delta$ , and from  $\Gamma$  to L it will change the *k* vector along  $\Lambda$ . From  $\Gamma$  to K, the *k* vector changes along  $\Sigma$ . The 117 cm<sup>-1</sup> peak in Figure S1(a) is 2 (TA, transverse acoustic) phonon occurred at  $\Gamma$ , and the 219-cm<sup>-1</sup> mode is 2 (LA)

vibration along the X- $\Gamma$  in the BZ. The 275  $\text{cm}^{-1}$  peak is the TO mode of the *c*-ZnS at  $\Gamma$  and the 396  $\text{cm}^{-1}$  peak responsible for the combination of LO+TA occurred at X point. The 422  $\text{cm}^{-1}$  frequency may contain both of TO+LA at X and LO+TA at L. The peaks of 449, 513, and 614  $\text{cm}^{-1}$  in the Raman spectrum are those of LO+LA at  $\Gamma$ , 2(0) at W, and 2 (TO) at L point, respectively. The LO+TO and 2(LO) modes are respectively occurred at 636 and 670  $\text{cm}^{-1}$  in the zone center of the BZ. All the structural characterization identifies an excellent *c*-ZnS substrate crystal has been successfully grown by the CVT method with I<sub>2</sub> as the transport agent.

**Supporting Information Reference:**

(32) Y. C. Cheng, C. Q. Jin, F. Gao, X. L. Wu, W. Zhong, S. H. Li, P. K. Chu, *J. Appl. Phys.* 2009, **106**, 123505.

(33) W. G. Nilsen, *Phys.Rev.* 1969, **182**, 838-850.
